# Supplementary material
Source: Springer Nature journal article supplement (https://www.springermedizin.de/resource/supplementary/12889_2013_6343_MOESM1_ESM.pdf/9497004)
Supplement: MOESM1 [file 9497004]

Systematic sampling of candidate patients appointed for visits with FPs  
N = 16663

Not assessed  
3621 (21.7%)

Physical activity (PA) assessment by FPs: N = 13042 (78.3%)

Physically active  
2592 (19.9%)

Eligible as "insufficiently active":  
10450 (80.1%)

Not included 5523 (52.8%):  
Exclusion criteria: 3649  
Refused informed consent: 999  
Failed baseline measurement: 875

Enrolled into the study  
n = 4927 (47.2%)

Met minimum PA recommendations at baseline measurement  
610 (12.4%)

Confirmed as insufficiently active by 7d-PAR at baseline measurement and included:  
4317 (87.6%)

Patients with at least one follow-up measurement at 6, 12 or 24 months  
3691 (85% of included)
